# Supplementary material for: Uranium azide photolysis results in C–H bond activation and provides evidence for a terminal uranium nitride
Source: Springer Nature journal article supplement (doi:10.1038/nchem.705), 2010-07-11
Supplement: 41557_2010_BFnchem705_MOESM3_ESM.cif [file 41557_2010_BFnchem705_MOESM3_ESM.cif]

 
data_apx762a

_audit_creation_method           SHELXL-97
_chemical_name_systematic        
; 
 ? 
;
_chemical_name_common            ?
_chemical_melting_point          ?
_chemical_formula_moiety         ?
_chemical_formula_sum            'C32 H40 N4 U'
_chemical_formula_weight         718.71

loop_
_atom_type_symbol
_atom_type_description
_atom_type_scat_dispersion_real
_atom_type_scat_dispersion_imag
_atom_type_scat_source
C C 0.0033 0.0016 'International Tables Vol C Tables 4.2.6.8 and 6.1.1.4'
H H 0.0000 0.0000 'International Tables Vol C Tables 4.2.6.8 and 6.1.1.4'
N N 0.0061 0.0033 'International Tables Vol C Tables 4.2.6.8 and 6.1.1.4'
U U -9.6767 9.6646 'International Tables Vol C Tables 4.2.6.8 and 6.1.1.4'

_symmetry_cell_setting           orthorhombic
_symmetry_space_group_name_H-M   'P nma'

loop_
_symmetry_equiv_pos_as_xyz
'x, y, z'
'-x+1/2, -y, z+1/2'
'-x, y+1/2, -z'
'x+1/2, -y+1/2, -z+1/2'
'-x, -y, -z'
'x-1/2, y, -z-1/2'
'x, -y-1/2, z'
'-x-1/2, y-1/2, z-1/2'

_cell_length_a                   17.482(4)
_cell_length_b                   12.657(3)
_cell_length_c                   12.915(3)
_cell_angle_alpha                90.00
_cell_angle_beta                 90.00
_cell_angle_gamma                90.00
_cell_volume                     2857.6(12)
_cell_formula_units_Z            4
_cell_measurement_temperature    120(1)
_cell_measurement_reflns_used    ?
_cell_measurement_theta_min      ?
_cell_measurement_theta_max      ?

_exptl_crystal_description       'multifaceted block'
_exptl_crystal_colour            'dark red'
_exptl_crystal_size_max          0.18
_exptl_crystal_size_mid          0.12
_exptl_crystal_size_min          0.06
_exptl_crystal_density_meas      ?
_exptl_crystal_density_diffrn    1.671
_exptl_crystal_density_method    'not measured'
_exptl_crystal_F_000             1408
_exptl_absorpt_coefficient_mu    5.707
_exptl_absorpt_correction_type   multi-scan
_exptl_absorpt_correction_T_min  0.4265
_exptl_absorpt_correction_T_max  0.7258
_exptl_absorpt_process_details   'SADABS 2.03 (Sheldrick, 2001)'

_exptl_special_details           
; 
 ? 
;

_diffrn_ambient_temperature      120(1)
_diffrn_radiation_wavelength     0.71073
_diffrn_radiation_type           MoK\a
_diffrn_radiation_source         'fine-focus sealed tube'
_diffrn_radiation_monochromator  graphite
_diffrn_measurement_device_type  'Bruker D8 with APEXII CCD'
_diffrn_measurement_method       '\w scans'
_diffrn_detector_area_resol_mean ?
_diffrn_standards_number         0
_diffrn_standards_interval_count 0
_diffrn_standards_interval_time  0
_diffrn_standards_decay_%        0
_diffrn_reflns_number            24739
_diffrn_reflns_av_R_equivalents  0.0843
_diffrn_reflns_av_sigmaI/netI    0.0630
_diffrn_reflns_limit_h_min       -22
_diffrn_reflns_limit_h_max       22
_diffrn_reflns_limit_k_min       -16
_diffrn_reflns_limit_k_max       16
_diffrn_reflns_limit_l_min       -17
_diffrn_reflns_limit_l_max       16
_diffrn_reflns_theta_min         1.96
_diffrn_reflns_theta_max         28.27
_reflns_number_total             3534
_reflns_number_gt                2834
_reflns_threshold_expression     >2sigma(I)

_computing_data_collection       'APEX II, v. 1.08 (Bruker AXS, 2003)'
_computing_cell_refinement       'SAINT+, v. 7.06 (Bruker AXS, 2001)'
_computing_data_reduction        'SAINT+, v. 7.06 (Bruker AXS, 2001)'
_computing_structure_solution    'SHELXS-97 (Sheldrick, 1990)'
_computing_structure_refinement  'SHELXL-97 (Sheldrick, 1997)'
_computing_molecular_graphics    'SHELXTL, v. 6.10, (Bruker AXS, 2000)'
_computing_publication_material  'SHELXTL, v. 6.10, (Bruker AXS, 2000)'

_refine_special_details          
; 
 Refinement of F^2^ against ALL reflections.  The weighted R-factor wR and 
 goodness of fit S are based on F^2^, conventional R-factors R are based 
 on F, with F set to zero for negative F^2^. The threshold expression of 
 F^2^ > 2sigma(F^2^) is used only for calculating R-factors(gt) etc. and is 
 not relevant to the choice of reflections for refinement.  R-factors based 
 on F^2^ are statistically about twice as large as those based on F, and R- 
 factors based on ALL data will be even larger.

 The uranium complex is disordered across a mirror plane that contains only
 the uranium atom.  All atoms refined as one-half occupancy. 
;

_refine_ls_structure_factor_coef Fsqd
_refine_ls_matrix_type           full
_refine_ls_weighting_scheme      calc
_refine_ls_weighting_details     
'calc w=1/[\s^2^(Fo^2^)+(0.0309P)^2^+0.0000P] where P=(Fo^2^+2Fc^2^)/3'
_atom_sites_solution_primary     direct
_atom_sites_solution_secondary   difmap
_atom_sites_solution_hydrogens   geom

_refine_ls_hydrogen_treatment    constr
_refine_ls_extinction_method     none
_refine_ls_extinction_coef       ?
_refine_ls_number_reflns         3534
_refine_ls_number_parameters     182
_refine_ls_number_restraints     60
_refine_ls_R_factor_all          0.0736
_refine_ls_R_factor_gt           0.0568
_refine_ls_wR_factor_ref         0.1625
_refine_ls_wR_factor_gt          0.1599
_refine_ls_goodness_of_fit_ref   2.211
_refine_ls_restrained_S_all      2.198
_refine_ls_shift/su_max          0.000
_refine_ls_shift/su_mean         0.000

loop_
_atom_site_label
_atom_site_type_symbol
_atom_site_fract_x
_atom_site_fract_y
_atom_site_fract_z
_atom_site_U_iso_or_equiv
_atom_site_adp_type
_atom_site_occupancy
_atom_site_symmetry_multiplicity
_atom_site_calc_flag
_atom_site_refinement_flags
_atom_site_disorder_assembly
_atom_site_disorder_group
U1 U 0.18667(3) 0.2500 0.44947(3) 0.01460(18) Uani 1 2 d S . .
N1 N 0.2464(10) 0.3549(13) 0.3298(12) 0.022(4) Uani 0.50 1 d PU . .
N2 N 0.3050(9) 0.3736(11) 0.2845(11) 0.020(3) Uani 0.50 1 d PU . .
N3 N 0.3569(10) 0.3912(13) 0.2384(13) 0.029(4) Uani 0.50 1 d PU . .
N4 N 0.2702(2) 0.2788(3) 0.5868(3) 0.014(3) Uani 0.50 1 d P . .
C1 C 0.1116(2) 0.4356(3) 0.4484(3) 0.022(2) Uani 0.50 1 d PR . .
C2 C 0.0648(2) 0.3762(3) 0.3798(3) 0.022(4) Uani 0.50 1 d PR . .
C3 C 0.0241(2) 0.3004(3) 0.4393(3) 0.029(5) Uani 0.50 1 d PR . .
C4 C 0.0457(2) 0.3130(3) 0.5446(3) 0.022(2) Uani 0.50 1 d PR . .
C5 C 0.0997(2) 0.3965(3) 0.5502(3) 0.022(2) Uani 0.50 1 d PRU . .
C6 C 0.1645(2) 0.5247(3) 0.4183(3) 0.059(5) Uani 0.50 1 d PR . .
C7 C 0.0594(2) 0.3910(3) 0.2641(3) 0.059(5) Uani 0.50 1 d PR . .
C8 C -0.0322(2) 0.2205(3) 0.3979(3) 0.035(6) Uani 0.50 1 d PR . .
C9 C 0.0164(2) 0.2498(3) 0.6347(3) 0.030(3) Uani 1 2 d SR . .
C10 C 0.1379(2) 0.4367(3) 0.6473(3) 0.059(5) Uani 0.50 1 d PR . .
C11 C 0.1545(2) 0.0720(3) 0.3208(3) 0.028(3) Uani 0.50 1 d PR . .
C12 C 0.1659(2) 0.0304(3) 0.4217(3) 0.028(3) Uani 0.50 1 d PR . .
C13 C 0.2438(2) 0.0460(3) 0.4488(3) 0.028(3) Uani 0.50 1 d PR . .
C14 C 0.2805(2) 0.0974(3) 0.3647(3) 0.023(4) Uani 0.50 1 d PR . .
C15 C 0.2254(2) 0.1135(3) 0.2856(3) 0.021(4) Uani 0.50 1 d PRU . .
C16 C 0.0801(2) 0.0723(3) 0.2614(3) 0.023(3) Uani 0.50 1 d PR . .
H16A H 0.0878 0.1051 0.1952 0.035 Uiso 0.50 1 calc PR . .
H16B H 0.0423 0.1110 0.2996 0.035 Uiso 0.50 1 calc PR . .
H16C H 0.0630 0.0009 0.2517 0.035 Uiso 0.50 1 calc PR . .
C17 C 0.1057(2) -0.0215(3) 0.4884(3) 0.023(3) Uani 0.50 1 d PR . .
H17A H 0.1269 -0.0370 0.5553 0.035 Uiso 0.50 1 calc PR . .
H17B H 0.0891 -0.0859 0.4563 0.035 Uiso 0.50 1 calc PR . .
H17C H 0.0630 0.0254 0.4962 0.035 Uiso 0.50 1 calc PR . .
C18 C 0.2810(2) 0.0137(3) 0.5495(3) 0.025(4) Uani 0.50 1 d PR . .
H18A H 0.2437 -0.0195 0.5932 0.038 Uiso 0.50 1 calc PR . .
H18B H 0.3011 0.0751 0.5835 0.038 Uiso 0.50 1 calc PR . .
H18C H 0.3218 -0.0350 0.5356 0.038 Uiso 0.50 1 calc PR . .
C19 C 0.3637(2) 0.1293(3) 0.3602(3) 0.025(4) Uani 0.50 1 d PRU . .
H19A H 0.3740 0.1626 0.2949 0.037 Uiso 0.50 1 calc PR . .
H19B H 0.3953 0.0677 0.3674 0.037 Uiso 0.50 1 calc PR . .
H19C H 0.3746 0.1778 0.4153 0.037 Uiso 0.50 1 calc PR . .
C20 C 0.2395(2) 0.1655(3) 0.1821(3) 0.023(3) Uani 0.50 1 d PR . .
H20A H 0.2922 0.1865 0.1775 0.035 Uiso 0.50 1 calc PR . .
H20B H 0.2073 0.2265 0.1756 0.035 Uiso 0.50 1 calc PR . .
H20C H 0.2281 0.1164 0.1276 0.035 Uiso 0.50 1 calc PR . .
C21 C 0.3470(4) 0.3195(6) 0.5758(4) 0.027(5) Uani 0.50 1 d PG . .
C22 C 0.3588(5) 0.4074(8) 0.5134(6) 0.030(5) Uani 0.50 1 d PG . .
H22 H 0.3171 0.4451 0.4879 0.035 Uiso 0.50 1 calc PR . .
C23 C 0.4327(6) 0.4391(8) 0.4890(7) 0.044(6) Uani 0.50 1 d PG . .
H23 H 0.4406 0.4979 0.4472 0.053 Uiso 0.50 1 calc PR . .
C24 C 0.4949(5) 0.3828(9) 0.5271(7) 0.037(3) Uani 0.50 1 d PG . .
H24 H 0.5444 0.4040 0.5108 0.044 Uiso 0.50 1 calc PR . .
C25 C 0.4832(4) 0.2949(9) 0.5895(7) 0.037(3) Uani 0.50 1 d PGU . .
H25 H 0.5248 0.2572 0.6150 0.044 Uiso 0.50 1 calc PR . .
C26 C 0.4092(4) 0.2632(6) 0.6139(5) 0.037(3) Uani 0.50 1 d PG . .
H26 H 0.4013 0.2044 0.6557 0.044 Uiso 0.50 1 calc PR . .
C27 C 0.2468(3) 0.2499(6) 0.6879(4) 0.023(3) Uani 1 2 d SGU . .
C28 C 0.2769(4) 0.2991(5) 0.7749(4) 0.024(4) Uani 0.50 1 d PG . .
H28 H 0.3157 0.3487 0.7677 0.029 Uiso 0.50 1 calc PR . .
C29 C 0.2491(5) 0.2742(7) 0.8727(4) 0.022(5) Uani 0.50 1 d PGU . .
H29 H 0.2692 0.3073 0.9309 0.026 Uiso 0.50 1 calc PR . .
C30 C 0.1912(5) 0.1998(7) 0.8836(6) 0.030(5) Uani 0.50 1 d PG . .
H30 H 0.1726 0.1831 0.9490 0.035 Uiso 0.50 1 calc PR . .
C31 C 0.1610(4) 0.1502(7) 0.7966(6) 0.026(5) Uani 0.50 1 d PG . .
H31 H 0.1223 0.1005 0.8038 0.032 Uiso 0.50 1 calc PR . .
C32 C 0.1889(4) 0.1751(7) 0.6987(6) 0.024(4) Uani 0.50 1 d PG . .
H32 H 0.1688 0.1419 0.6405 0.028 Uiso 0.50 1 calc PR . .

loop_
_atom_site_aniso_label
_atom_site_aniso_U_11
_atom_site_aniso_U_22
_atom_site_aniso_U_33
_atom_site_aniso_U_23
_atom_site_aniso_U_13
_atom_site_aniso_U_12
U1 0.0120(3) 0.0178(3) 0.0141(3) 0.000 -0.0006(2) 0.000
N1 0.020(7) 0.026(7) 0.020(7) -0.007(6) 0.015(6) -0.006(6)
N2 0.029(8) 0.016(6) 0.015(6) 0.003(5) -0.012(6) 0.004(6)
N3 0.027(8) 0.027(7) 0.033(7) 0.004(6) 0.006(6) 0.004(6)
N4 0.015(8) 0.006(8) 0.021(7) -0.005(4) 0.003(6) 0.000(5)
C1 0.019(6) 0.024(5) 0.024(6) -0.005(4) -0.010(5) 0.003(4)
C2 0.026(11) 0.021(8) 0.019(9) 0.005(7) 0.001(8) -0.001(8)
C3 0.035(13) 0.026(9) 0.025(11) 0.009(8) 0.003(9) -0.013(9)
C4 0.019(6) 0.024(5) 0.024(6) -0.005(4) -0.010(5) 0.003(4)
C5 0.019(6) 0.024(5) 0.024(6) -0.005(4) -0.010(5) 0.003(4)
C6 0.069(12) 0.047(9) 0.062(10) 0.009(7) -0.039(9) -0.031(8)
C7 0.069(12) 0.047(9) 0.062(10) 0.009(7) -0.039(9) -0.031(8)
C8 0.054(14) 0.020(12) 0.033(10) 0.008(7) -0.035(10) -0.017(8)
C9 0.011(7) 0.044(8) 0.034(8) 0.000 0.006(6) 0.000
C10 0.069(12) 0.047(9) 0.062(10) 0.009(7) -0.039(9) -0.031(8)
C11 0.018(6) 0.014(5) 0.051(8) 0.004(5) 0.001(5) 0.006(4)
C12 0.018(6) 0.014(5) 0.051(8) 0.004(5) 0.001(5) 0.006(4)
C13 0.018(6) 0.014(5) 0.051(8) 0.004(5) 0.001(5) 0.006(4)
C14 0.008(10) 0.032(11) 0.029(11) 0.000(9) 0.004(8) 0.005(8)
C15 0.034(12) 0.020(9) 0.010(9) -0.006(7) -0.008(8) 0.005(8)
C16 0.020(7) 0.034(6) 0.017(5) -0.004(4) -0.009(4) -0.003(5)
C17 0.020(7) 0.034(6) 0.017(5) -0.004(4) -0.009(4) -0.003(5)
C18 0.018(11) 0.037(11) 0.021(10) 0.007(8) -0.002(8) 0.000(9)
C19 0.021(8) 0.025(7) 0.028(8) 0.003(6) 0.014(7) -0.006(6)
C20 0.020(7) 0.034(6) 0.017(5) -0.004(4) -0.009(4) -0.003(5)
C21 0.022(11) 0.024(10) 0.035(11) -0.003(8) -0.009(9) -0.001(8)
C22 0.039(14) 0.029(11) 0.020(10) 0.004(8) 0.003(9) 0.004(10)
C23 0.028(14) 0.061(15) 0.044(13) -0.011(11) 0.005(11) -0.027(12)
C24 0.034(6) 0.054(6) 0.023(5) -0.012(5) -0.005(4) -0.008(6)
C25 0.034(6) 0.054(6) 0.023(5) -0.012(5) -0.005(4) -0.008(6)
C26 0.034(6) 0.054(6) 0.023(5) -0.012(5) -0.005(4) -0.008(6)
C27 0.017(7) 0.024(6) 0.027(7) 0.000 -0.017(6) 0.000
C28 0.025(11) 0.023(9) 0.024(10) 0.000(8) 0.007(8) -0.005(8)
C29 0.024(10) 0.016(13) 0.026(9) -0.009(6) -0.018(7) 0.004(6)
C30 0.043(15) 0.025(9) 0.020(10) 0.009(8) 0.003(9) 0.005(10)
C31 0.017(10) 0.017(9) 0.045(13) -0.006(8) -0.007(9) 0.012(8)
C32 0.036(13) 0.015(8) 0.021(9) 0.002(7) 0.006(9) 0.007(8)

_geom_special_details            
; 
 All esds (except the esd in the dihedral angle between two l.s. planes) 
 are estimated using the full covariance matrix.  The cell esds are taken 
 into account individually in the estimation of esds in distances, angles 
 and torsion angles; correlations between esds in cell parameters are only 
 used when they are defined by crystal symmetry.  An approximate (isotropic) 
 treatment of cell esds is used for estimating esds involving l.s. planes. 
;

loop_
_geom_bond_atom_site_label_1
_geom_bond_atom_site_label_2
_geom_bond_distance
_geom_bond_site_symmetry_2
_geom_bond_publ_flag
U1 N1 2.289(15) . ?
U1 N4 2.325(4) . ?
U1 C1 2.691(4) . ?
U1 C5 2.728(4) . ?
U1 C14 2.761(4) . ?
U1 C13 2.768(4) . ?
U1 C2 2.810(4) . ?
U1 C15 2.815(4) . ?
U1 C12 2.826(4) . ?
U1 C11 2.855(4) . ?
U1 C4 2.866(4) . ?
U1 C3 2.915(4) . ?
N1 N2 1.20(2) . ?
N2 N3 1.11(2) . ?
N4 C27 1.416(7) . ?
N4 C21 1.446(8) . ?
C1 C5 1.4200 . ?
C1 C2 1.4200 . ?
C1 C6 1.5094 . ?
C2 C3 1.4200 . ?
C2 C7 1.5095 . ?
C3 C4 1.4200 . ?
C3 C8 1.5095 . ?
C4 C5 1.4200 . ?
C4 C9 1.5024 . ?
C5 C10 1.5095 . ?
C11 C15 1.4200 . ?
C11 C12 1.4200 . ?
C11 C16 1.5094 . ?
C12 C13 1.4200 . ?
C12 C17 1.5094 . ?
C13 C14 1.4200 . ?
C13 C18 1.5095 . ?
C14 C15 1.4200 . ?
C14 C19 1.5095 . ?
C15 C20 1.5095 . ?
C21 C22 1.3900 . ?
C21 C26 1.3900 . ?
C22 C23 1.3900 . ?
C23 C24 1.3900 . ?
C24 C25 1.3900 . ?
C25 C26 1.3900 . ?
C27 C28 1.3880 . ?
C27 C32 1.3930 . ?
C28 C29 1.3900 . ?
C29 C30 1.3900 . ?
C30 C31 1.3900 . ?
C31 C32 1.3900 . ?

loop_
_geom_angle_atom_site_label_1
_geom_angle_atom_site_label_2
_geom_angle_atom_site_label_3
_geom_angle
_geom_angle_site_symmetry_1
_geom_angle_site_symmetry_3
_geom_angle_publ_flag
N1 U1 N4 97.9(4) . . ?
N1 U1 C1 73.3(4) . . ?
N4 U1 C1 99.99(15) . . ?
N1 U1 C5 100.5(4) . . ?
N4 U1 C5 83.08(13) . . ?
C1 U1 C5 30.4 . . ?
N1 U1 C14 82.4(4) . . ?
N4 U1 C14 92.24(14) . . ?
C1 U1 C14 153.98(17) . . ?
C5 U1 C14 174.80(17) . . ?
N1 U1 C13 112.0(4) . . ?
N4 U1 C13 85.52(13) . . ?
C1 U1 C13 171.92(18) . . ?
C5 U1 C13 146.77(17) . . ?
C14 U1 C13 29.8 . . ?
N1 U1 C2 78.5(4) . . ?
N4 U1 C2 129.10(17) . . ?
C1 U1 C2 29.8 . . ?
C5 U1 C2 49.00(8) . . ?
C14 U1 C2 136.16(15) . . ?
C13 U1 C2 143.38(16) . . ?
N1 U1 C15 74.9(4) . . ?
N4 U1 C15 121.25(17) . . ?
C1 U1 C15 130.48(15) . . ?
C5 U1 C15 155.48(17) . . ?
C14 U1 C15 29.5 . . ?
C13 U1 C15 48.59(7) . . ?
C2 U1 C15 106.88(13) . . ?
N1 U1 C12 122.9(4) . . ?
N4 U1 C12 109.36(15) . . ?
C1 U1 C12 142.67(17) . . ?
C5 U1 C12 131.11(16) . . ?
C14 U1 C12 48.54(7) . . ?
C13 U1 C12 29.4 . . ?
C2 U1 C12 114.90(14) . . ?
C15 U1 C12 48.07(7) . . ?
N1 U1 C11 98.9(4) . . ?
N4 U1 C11 133.72(18) . . ?
C1 U1 C11 126.12(15) . . ?
C5 U1 C11 134.76(16) . . ?
C14 U1 C11 48.26(7) . . ?
C13 U1 C11 48.20(7) . . ?
C2 U1 C11 96.48(12) . . ?
C15 U1 C11 29.0 . . ?
C12 U1 C11 28.9 . . ?
N1 U1 C4 121.3(4) . . ?
N4 U1 C4 99.74(14) . . ?
C1 U1 C4 48.71(8) . . ?
C5 U1 C4 29.3 . . ?
C14 U1 C4 151.09(17) . . ?
C13 U1 C4 124.79(15) . . ?
C2 U1 C4 47.74(7) . . ?
C15 U1 C4 134.38(16) . . ?
C12 U1 C4 102.55(14) . . ?
C11 U1 C4 107.42(14) . . ?
N1 U1 C3 106.7(5) . . ?
N4 U1 C3 127.72(17) . . ?
C1 U1 C3 48.18(7) . . ?
C5 U1 C3 47.91(7) . . ?
C14 U1 C3 135.60(15) . . ?
C13 U1 C3 123.74(15) . . ?
C2 U1 C3 28.6 . . ?
C15 U1 C3 109.55(13) . . ?
C12 U1 C3 94.83(13) . . ?
C11 U1 C3 87.38(12) . . ?
C4 U1 C3 28.4 . . ?
N2 N1 U1 146.2(14) . . ?
N3 N2 N1 176.6(19) . . ?
C27 N4 C21 116.8(5) . . ?
C27 N4 U1 118.8(3) . . ?
C21 N4 U1 124.4(3) . . ?
C5 C1 C2 108.0 . . ?
C5 C1 C6 126.0 . . ?
C2 C1 C6 126.0 . . ?
C5 C1 U1 76.23(9) . . ?
C2 C1 U1 79.73(9) . . ?
C6 C1 U1 110.74(9) . . ?
C3 C2 C1 108.0 . . ?
C3 C2 C7 126.0 . . ?
C1 C2 C7 126.0 . . ?
C3 C2 U1 79.79(9) . . ?
C1 C2 U1 70.45(9) . . ?
C7 C2 U1 115.81(8) . . ?
C2 C3 C4 108.0 . . ?
C2 C3 C8 126.0 . . ?
C4 C3 C8 126.0 . . ?
C2 C3 U1 71.57(8) . . ?
C4 C3 U1 73.88(8) . . ?
C8 C3 U1 120.34(8) . . ?
C5 C4 C3 108.0 . . ?
C5 C4 C9 125.7 . . ?
C3 C4 C9 126.3 . . ?
C5 C4 U1 69.94(9) . . ?
C3 C4 U1 77.70(8) . . ?
C9 C4 U1 118.53(8) . . ?
C4 C5 C1 108.0 . . ?
C4 C5 C10 126.0 . . ?
C1 C5 C10 126.0 . . ?
C4 C5 U1 80.79(9) . . ?
C1 C5 U1 73.40(9) . . ?
C10 C5 U1 112.29(9) . . ?
C15 C11 C12 108.0 . . ?
C15 C11 C16 126.0 . . ?
C12 C11 C16 126.0 . . ?
C15 C11 U1 73.95(9) . . ?
C12 C11 U1 74.42(8) . . ?
C16 C11 U1 117.63(9) . . ?
C11 C12 C13 108.0 . . ?
C11 C12 C17 126.0 . . ?
C13 C12 C17 126.0 . . ?
C11 C12 U1 76.64(8) . . ?
C13 C12 U1 73.03(9) . . ?
C17 C12 U1 116.41(9) . . ?
C14 C13 C12 108.0 . . ?
C14 C13 C18 126.0 . . ?
C12 C13 C18 126.0 . . ?
C14 C13 U1 74.84(9) . . ?
C12 C13 U1 77.58(9) . . ?
C18 C13 U1 113.91(8) . . ?
C13 C14 C15 108.0 . . ?
C13 C14 C19 126.0 . . ?
C15 C14 C19 126.0 . . ?
C13 C14 U1 75.40(9) . . ?
C15 C14 U1 77.37(8) . . ?
C19 C14 U1 113.61(9) . . ?
C11 C15 C14 108.0 . . ?
C11 C15 C20 126.0 . . ?
C14 C15 C20 126.0 . . ?
C11 C15 U1 77.06(9) . . ?
C14 C15 U1 73.15(9) . . ?
C20 C15 U1 115.92(9) . . ?
C22 C21 C26 120.0 . . ?
C22 C21 N4 118.7(3) . . ?
C26 C21 N4 120.7(4) . . ?
C23 C22 C21 120.0 . . ?
C22 C23 C24 120.0 . . ?
C25 C24 C23 120.0 . . ?
C24 C25 C26 120.0 . . ?
C25 C26 C21 120.0 . . ?
C28 C27 C32 119.9 . . ?
C28 C27 N4 121.4(3) . . ?
C32 C27 N4 118.5(3) . . ?
C27 C28 C29 120.1 . . ?
C28 C29 C30 120.0 . . ?
C31 C30 C29 120.0 . . ?
C30 C31 C32 120.0 . . ?
C31 C32 C27 120.0 . . ?

_diffrn_measured_fraction_theta_max 0.956
_diffrn_reflns_theta_full        25.00
_diffrn_measured_fraction_theta_full 0.999
_refine_diff_density_max         2.338
_refine_diff_density_min         -2.096
_refine_diff_density_rms         0.256
