# Supplementary material for: Uranium azide photolysis results in C–H bond activation and provides evidence for a terminal uranium nitride
Source: Springer Nature journal article supplement (doi:10.1038/nchem.705), 2010-07-11
Supplement: 41557_2010_BFnchem705_MOESM13_ESM.mol [file 41557_2010_BFnchem705_MOESM13_ESM.mol]

  ChemDraw06221005572D

 31 29  0  0  0  0  0  0  0  0999 V2000
   -2.5103    2.1742    0.0000 C   0  0  0  0  0  0  0  0  0  0  0  0
   -2.5103    1.3492    0.0000 C   0  0  0  0  0  0  0  0  0  0  0  0
   -1.7257    1.0943    0.0000 C   0  0  0  0  0  0  0  0  0  0  0  0
   -1.2407    1.7617    0.0000 C   0  0  0  0  0  0  0  0  0  0  0  0
   -1.7257    2.4292    0.0000 C   0  5  0  0  0  0  0  0  0  0  0  0
   -1.4716    3.2111    0.0000 C   0  0  0  0  0  0  0  0  0  0  0  0
   -0.4186    1.7617    0.0000 C   0  0  0  0  0  0  0  0  0  0  0  0
   -1.4716    0.3124    0.0000 C   0  0  0  0  0  0  0  0  0  0  0  0
   -3.1754    2.6575    0.0000 C   0  0  0  0  0  0  0  0  0  0  0  0
   -3.1754    0.8660    0.0000 C   0  0  0  0  0  0  0  0  0  0  0  0
   -2.0492   -1.3492    0.0000 C   0  0  0  0  0  0  0  0  0  0  0  0
   -2.0492   -2.1742    0.0000 C   0  0  0  0  0  0  0  0  0  0  0  0
   -1.2646   -2.4292    0.0000 C   0  0  0  0  0  0  0  0  0  0  0  0
   -0.7796   -1.7617    0.0000 C   0  0  0  0  0  0  0  0  0  0  0  0
   -1.2646   -1.0943    0.0000 C   0  5  0  0  0  0  0  0  0  0  0  0
   -1.0105   -0.3124    0.0000 C   0  0  0  0  0  0  0  0  0  0  0  0
    0.0425   -1.7617    0.0000 C   0  0  0  0  0  0  0  0  0  0  0  0
   -1.0105   -3.2111    0.0000 C   0  0  0  0  0  0  0  0  0  0  0  0
   -2.7143   -0.8660    0.0000 C   0  0  0  0  0  0  0  0  0  0  0  0
   -2.7143   -2.6575    0.0000 C   0  0  0  0  0  0  0  0  0  0  0  0
    0.6259   -1.1784    0.0000 N   0  5  0  0  0  0  0  0  0  0  0  0
   -0.0161    0.0816    0.0000 U   0  0  0  0  0  0  0  0  0  0  0  0
    1.5816    1.1530    0.0000 N   0  5  0  0  0  0  0  0  0  0  0  0
    2.3785    0.9395    0.0000 Si  0  0  0  0  0  0  0  0  0  0  0  0
    1.5816    1.9780    0.0000 Si  0  0  0  0  0  0  0  0  0  0  0  0
    0.7847    2.1915    0.0000 C   0  0  0  0  0  0  0  0  0  0  0  0
    1.5816    2.8030    0.0000 C   0  0  0  0  0  0  0  0  0  0  0  0
    2.1650    2.5614    0.0000 C   0  0  0  0  0  0  0  0  0  0  0  0
    2.9619    1.5228    0.0000 C   0  0  0  0  0  0  0  0  0  0  0  0
    2.7910    0.2250    0.0000 C   0  0  0  0  0  0  0  0  0  0  0  0
    3.1754    0.7259    0.0000 C   0  0  0  0  0  0  0  0  0  0  0  0
  1  2  2  0      
  2  3  1  0      
  3  4  2  0      
  4  5  1  0      
  5  1  1  0      
  5  6  1  0      
  4  7  1  0      
  3  8  1  0      
  1  9  1  0      
  2 10  1  0      
 11 12  2  0      
 12 13  1  0      
 13 14  2  0      
 14 15  1  0      
 15 11  1  0      
 15 16  1  0      
 14 17  1  0      
 13 18  1  0      
 11 19  1  0      
 12 20  1  0      
 17 21  1  0      
 23 24  1  0      
 23 25  1  0      
 25 26  1  0      
 25 27  1  0      
 25 28  1  0      
 24 29  1  0      
 24 30  1  0      
 24 31  1  0      
M  CHG  5   5  -1  15  -1  21  -1  22   4  23  -1
M  END
